# Supplementary material
Source: publisher site journal article supplement (https://www.dovepress.com/article/299261)
Supplement: Supplementary file 1 [file get_supplementary_file.php]

**Supplementary materials**

**Supplementary Methodology**

1. **Content Assay**
   1. For *verapamil hydrochloride* mobile phase contained acetonitrile, 2-aminoheptane, and buffer in the ratio of 60:1:140. The buffer contained sodium acetate and glacial acetic acid in water. The column of 4.6mm x 15cm, of L1 packing (Symmetry C-18, Waters Corporation, Milford, USA) was employed. HPLC was operated at 1mL/min with a detection wavelength of 278nm and injection volume of 10µL.1
   2. For *flurbiprofen*, a 4mm x 25mmcolumn with L7 packing (Lichrospher® C-8, Merck, Darmstadt, Germany) was used, along with a UV detector set at 254nm. The mobile phase contained 1.4g monobasic sodium phosphate in 570mL water, 430mL acetonitrile, adjusted to pH 3.0 using phosphoric acid. 0.8µL/mL acetone solution in the mobile phase was used as an internal standard solution. Injection volume was 20µL and the flow rate was 2mL/minute.1
   3. For analysing *atenolol* samples, the mobile phase was prepared using 1.1g sodium 1-heptane sulfonate and 0.71g anhydrous dibasic sodium phosphate in 700mL water. Dibutylamine, 2mL, was added and pH was adjusted to 3.0 using 0.8M phosphoric acid and then 300mL methanol was added. 3.9mm x 30cm column of L1 packing (Nova-Pak C-18, Waters Corporation, Milford, USA) was used. Injection volume 10 µL, 0.6mL/minute flow rate were set and UV detector was operated at 226nm.1
   4. The mobile phase for *furosemide* was made up of water, tetrahydrofuran, and glacial acetic acid in the ratio 70:30:1. UV detector was set for 254nm, and a column of 4.6mm x 25cm, packing L1 (Mediterranea Sea, Teknokroma, Barcelona, Spain) was used. Injection volume was 20 µL and the flow rate was set to 1mL/min.1

**Supplementary Equations**

**Equation S1. (Verapamil HCl)**

Percent Weight Gain = 6.3916 + 0.288197 * a + -0.46355 * B + 0.774979 * c[1] + 0.0691519 * c[2] + 1.17562 * d[1] + -0.0873247 * d[2] + 0.0827213 * aB + 0.275958 * ac[1] + -0.291928 * ac[2] + 0.198268 * ad[1] + -0.0934045 * ad[2] + -0.261859 * Bc[1] + 0.122941 * Bc[2] + 0.247518 * Bd[1] + -0.120603 * Bd[2] + -0.213551 * c[1]d[1] + 0.259173 * c[2]d[1] + -0.183137 * c[1]d[2] + -0.216688 * c[2]d[2] + -2.5846 * a^2 + 0.589626 * B^2

**Equation S2. (Flurbiprofen)**

Percent Weight Gain = 7.53498 + 0.933382 * a + 0.0640188 * B + 0.0928544 * c[1] + 0.592078 * c[2] + -0.53009 * d[1] + 0.0422343 * d[2] + 0.0527086 * aB + -0.106586 * ac[1] + 0.433302 * ac[2] + 0.014136 * ad[1] + 0.381785 * ad[2] + 0.153252 * Bc[1] + -0.112233 * Bc[2] + -0.0596428 * Bd[1] + 0.131481 * Bd[2] + 0.501957 * c[1]d[1] + -0.902963 * c[2]d[1] + -1.0726 * c[1]d[2] + 0.977172 * c[2]d[2] + -3.59488 * a^2 + 0.180166 * B^2

**Equation S3. (Atenolol)**

Percent Weight Gain = 4.38776 + 1.06377 * a + -0.0543635 * B + 0.891346 * c[1] + 0.140673 * c[2] + -1.16639 * d[1] + 0.356211 * d[2] + -0.282179 * aB + 0.747816 * ac[1] + -0.0657745 * ac[2] + -0.657838 * ad[1] + 0.306522 * ad[2] + 0.142947 * Bc[1] + -0.171779 * Bc[2] + -0.0212367 * Bd[1] + -0.0135434 * Bd[2] + -0.659277 * c[1]d[1] + -0.0582268 * c[2]d[1] + 0.179873 * c[1]d[2] + 0.0986503 * c[2]d[2] + -0.310125 * a^2 + 0.112439 * B^2

**Equation S4. (Furosemide)**

Percent Weight Gain = 4.23154 + 1.15019 * a + 0.302116 * B + 0.657977 * c[1] + 0.0417948 * c[2] + -0.719773 * d[1] + -0.133472 * d[2] + 0.073824 * aB + 0.497055 * ac[1] + -0.126627 * ac[2] + -0.673862 * ad[1] + 0.523439 * ad[2] + -0.0790327 * Bc[1] + -0.135188 * Bc[2] + -0.464283 * Bd[1] + 0.0368916 * Bd[2] + -0.495394 * c[1]d[1] + -0.359212 * c[2]d[1] + 0.278555 * c[1]d[2] + -0.444262 * c[2]d[2] + -0.344555 * a^2 + 0.0299533 * B^2

**Supplementary Table Captions**

**Table S1**: D-optimal split plot design generated for verapamil hydrochloride

**Table S2:** D-optimal split plot design generated for flurbiprofen

**Table S3:** D-optimal split plot design generated for atenolol

**Table S4:** D-optimal split plot design generated for furosemide

**Table S5:** **Mass gain (%) for verapamil hydrochloride loaded halloysite nanotubes**

**Table S6:** **Mass gain (%) for flurbiprofen loaded halloysite nanotubes**

**Table S7:** **Mass gain (%) for atenolol loaded halloysite nanotubes**

**Table S8:** **Mass gain (%) for furosemide loaded halloysite nanotubes**

**Supplementary Figure Captions**

**Figure S1.** 3D response surface optimization plots (desirability) against the set of constraints for best loading (percent weight gain) of halloysite nanotubes with (a) verapamil (b) flurbiprofen (c) atenolol (d) furosemide.

**Figure S2-1.** FTIR spectra of (a) halloysite nanotubes [HNTs], (b)verapamil HCl and (c) verapamil loaded HNTs.

**Figure S2-2.** FTIR spectra of (a) flurbiprofen and (b) flurbiprofen loaded HNTs.

**Figure S2-3.** FTIR spectra of (a) atenolol and (b) atenolol loaded HNTs.

**Figure S2-4.** FTIR spectra of (a) furosemide and (b) furosemide loaded HNTs.

**Figure S3-1.** Graphs of stability profiling of verapamil loaded HNTs.

**Figure S3-2.** Graphs of stability profiling of flurbiprofen loaded HNTs.

**Figure S3-3.** Graphs of stability profiling of atenolol loaded HNTs.

**Supplementary Tables**

**Table S1: D-optimal split plot design generated for verapamil hydrochloride**

|  |  | **Factor 1** | **Factor 2** | **Factor 3** | **Factor 4** | **Response 1** |
| --- | --- | --- | --- | --- | --- | --- |
| **Group** | **Run** | **a:Ratio** | **b:pH** | **c:Method** | **d:Solvent** | **Weight Gain** |
|  |  |  |  |  |  | % |
| 1 | 1 | 0.25 | 4.2 | Ag + Vacuum | MeOH:Water 45:55 | 5.23 |
| 1 | 2 | 0.25 | 7.6 | Ag + Vacuum | MeOH:Water 45:55 | 3.9 |
| 2 | 3 | 0.25 | 4.2 | Agitation | Water | 7.03 |
| 2 | 4 | 0.25 | 7.6 | Agitation | Water | 5.06 |
| 3 | 5 | 0.25 | 4.2 | Ag + Vacuum | Water | 6.03 |
| 3 | 6 | 0.25 | 9.6 | Ag + Vacuum | Water | 5.6 |
| 4 | 7 | 0.25 | 4.2 | Vacuum | MeOH:Water 90:10 | 3.32 |
| 4 | 8 | 0.25 | 9.6 | Vacuum | MeOH:Water 90:10 | 1.32 |
| 5 | 9 | 2 | 4.2 | Agitation | Water | 5.98 |
| 5 | 10 | 2 | 9.6 | Agitation | Water | 6.33 |
| 6 | 11 | 2 | 7.6 | Ag + Vacuum | Water | 5.1 |
| 6 | 12 | 2 | 4.2 | Ag + Vacuum | Water | 6.33 |
| 7 | 13 | 1 | 4.2 | Vacuum | MeOH:Water 90:10 | 4.97 |
| 7 | 14 | 1 | 7.6 | Vacuum | MeOH:Water 90:10 | 4.05 |
| 8 | 15 | 0.25 | 9.6 | Vacuum | MeOH:Water 45:55 | 4.26 |
| 8 | 16 | 0.25 | 4.2 | Vacuum | MeOH:Water 45:55 | 3.93 |
| 9 | 17 | 2 | 4.2 | Vacuum | MeOH:Water 90:10 | 2.52 |
| 9 | 18 | 2 | 9.6 | Vacuum | MeOH:Water 90:10 | 1.28 |
| 10 | 19 | 2 | 9.6 | Vacuum | MeOH:Water 45:55 | 3.28 |
| 10 | 20 | 2 | 4.2 | Vacuum | MeOH:Water 45:55 | 3.99 |
| 11 | 21 | 0.25 | 9.6 | Agitation | MeOH:Water 45:55 | 2.08 |
| 11 | 22 | 0.25 | 4.2 | Agitation | MeOH:Water 45:55 | 5.14 |
| 12 | 23 | 0.25 | 9.6 | Vacuum | Water | 3.92 |
| 12 | 24 | 0.25 | 4.2 | Vacuum | Water | 2.74 |
| 13 | 25 | 2 | 4.2 | Agitation | MeOH:Water 45:55 | 6.68 |
| 13 | 26 | 2 | 7.6 | Agitation | MeOH:Water 45:55 | 5.72 |
| 14 | 27 | 0.25 | 4.2 | Ag + Vacuum | MeOH:Water 90:10 | 3.39 |
| 14 | 28 | 0.25 | 9.6 | Ag + Vacuum | MeOH:Water 90:10 | 2.52 |
| 15 | 29 | 0.25 | 4.2 | Agitation | MeOH:Water 90:10 | 5.19 |
| 15 | 30 | 0.25 | 9.6 | Agitation | MeOH:Water 90:10 | 3.01 |
| 16 | 31 | 2 | 9.6 | Vacuum | Water | 5.24 |
| 16 | 32 | 2 | 4.2 | Vacuum | Water | 6.83 |
| 17 | 33 | 2 | 9.6 | Ag + Vacuum | MeOH:Water 45:55 | 3.15 |
| 17 | 34 | 2 | 4.2 | Ag + Vacuum | MeOH:Water 45:55 | 4.22 |
| 18 | 35 | 2 | 4.2 | Ag + Vacuum | MeOH:Water 90:10 | 3.76 |
| 18 | 36 | 2 | 9.6 | Ag + Vacuum | MeOH:Water 90:10 | 3.67 |
| 19 | 37 | 2 | 9.6 | Agitation | MeOH:Water 90:10 | 4.44 |
| 19 | 38 | 2 | 4.2 | Agitation | MeOH:Water 90:10 | 5.28 |

**Table S2: D-optimal split plot design generated for flurbiprofen**

|  |  | Factor 1 | Factor 2 | Factor 3 | Factor 4 | Response 1 |
| --- | --- | --- | --- | --- | --- | --- |
| Group | **Run** | **a:Ratio** | **b:pH** | **c:Method** | **d:Solvent** | **Weight gain** |
|  |  |  |  |  |  | % |
| 1 | 1 | 2 | 2.8 | Agitation | Water | 5.566 |
| 1 | 2 | 2 | 5.22 | Agitation | Water | 5.221 |
| 2 | 3 | 0.25 | 5.22 | Vacuum | Water | 3.45 |
| 2 | 4 | 0.25 | 2.8 | Vacuum | Water | 2.991 |
| 3 | 5 | 2 | 5.22 | Ag + Vacuum | EtOH:Water 45:55 | 7.857 |
| 3 | 6 | 2 | 2.8 | Ag + Vacuum | EtOH:Water 45:55 | 6.419 |
| 4 | 7 | 2 | 2.8 | Ag + Vacuum | Water | 5.67 |
| 4 | 8 | 2 | 4.22 | Ag + Vacuum | Water | 3.856 |
| 5 | 9 | 0.25 | 5.22 | Ag + Vacuum | Water | 1.458 |
| 5 | 10 | 0.25 | 2.8 | Ag + Vacuum | Water | 2.004 |
| 6 | 11 | 0.25 | 5.22 | Agitation | EtOH:Water 45:55 | 2.577 |
| 6 | 12 | 0.25 | 2.8 | Agitation | EtOH:Water 45:55 | 1.489 |
| 7 | 13 | 0.25 | 2.8 | Agitation | EtOH:Water 90:10 | 5.289 |
| 7 | 14 | 0.25 | 5.22 | Agitation | EtOH:Water 90:10 | 5.01 |
| 8 | 15 | 0.25 | 2.8 | Vacuum | EtOH:Water 90:10 | 2.899 |
| 8 | 16 | 0.25 | 5.22 | Vacuum | EtOH:Water 90:10 | 3.265 |
| 9 | 17 | 2 | 5.22 | Agitation | EtOH:Water 45:55 | 4.58 |
| 9 | 18 | 2 | 2.8 | Agitation | EtOH:Water 45:55 | 4.085 |
| 10 | 19 | 0.25 | 5.22 | Vacuum | EtOH:Water 45:55 | 1.256 |
| 10 | 20 | 0.25 | 2.8 | Vacuum | EtOH:Water 45:55 | 3.111 |
| 11 | 21 | 2 | 2.8 | Vacuum | Water | 2.897 |
| 11 | 22 | 2 | 5.22 | Vacuum | Water | 3.887 |
| 12 | 23 | 0.25 | 2.8 | Ag + Vacuum | EtOH:Water 45:55 | 4.65 |
| 12 | 24 | 0.25 | 5.22 | Ag + Vacuum | EtOH:Water 45:55 | 4.001 |
| 13 | 25 | 2 | 4.22 | Agitation | EtOH:Water 90:10 | 5.564 |
| 13 | 26 | 2 | 2.8 | Agitation | EtOH:Water 90:10 | 4.885 |
| 14 | 27 | 1 | 5.22 | Ag + Vacuum | EtOH:Water 90:10 | 8.267 |
| 14 | 28 | 1 | 3.22 | Ag + Vacuum | EtOH:Water 90:10 | 8.603 |
| 15 | 29 | 0.25 | 4.22 | Ag + Vacuum | EtOH:Water 90:10 | 4.872 |
| 15 | 30 | 0.25 | 2.8 | Ag + Vacuum | EtOH:Water 90:10 | 3.057 |
| 16 | 31 | 2 | 2.8 | Vacuum | EtOH:Water 45:55 | 4.048 |
| 16 | 32 | 2 | 5.22 | Vacuum | EtOH:Water 45:55 | 5.877 |
| 17 | 33 | 2 | 2.8 | Ag + Vacuum | EtOH:Water 90:10 | 6.544 |
| 17 | 34 | 2 | 5.22 | Ag + Vacuum | EtOH:Water 90:10 | 5.999 |
| 18 | 35 | 0.25 | 3.22 | Agitation | Water | 2.465 |
| 18 | 36 | 0.25 | 5.22 | Agitation | Water | 3.421 |
| 19 | 37 | 2 | 2.8 | Vacuum | EtOH:Water 90:10 | 4.528 |
| 19 | 38 | 2 | 5.22 | Vacuum | EtOH:Water 90:10 | 3.015 |

**Table S3: D-optimal split plot design generated for atenolol**

|  |  | Factor 1 | Factor2 | Factor 3 | Factor 4 | Response 1 |
| --- | --- | --- | --- | --- | --- | --- |
| Group | **Run** | **a:Ratio** | **b:pH** | **c:Method** | **d:Solvent** | **Weight gain** |
|  |  |  |  |  |  | % |
| 1 | 1 | 0.25 | 10.6 | Ag + Vacuum | MeOH:Water 45:55 | 4.41 |
| 1 | 2 | 0.25 | 7.48 | Ag + Vacuum | MeOH:Water 45:55 | 3.465 |
| 2 | 3 | 2 | 10.6 | Agitation | MeOH:Water 90:10 | 8.652 |
| 2 | 4 | 2 | 7.48 | Agitation | MeOH:Water 90:10 | 8.407 |
| 3 | 5 | 2 | 7.48 | Ag + Vacuum | Water | 5.056 |
| 3 | 6 | 2 | 10.6 | Ag + Vacuum | Water | 2.147 |
| 4 | 7 | 2 | 7.48 | Ag + Vacuum | MeOH:Water 45:55 | 6.015 |
| 4 | 8 | 2 | 9.6 | Ag + Vacuum | MeOH:Water 45:55 | 5.489 |
| 5 | 9 | 0.25 | 7.48 | Vacuum | MeOH:Water 90:10 | 2.349 |
| 5 | 10 | 0.25 | 10.6 | Vacuum | MeOH:Water 90:10 | 3.837 |
| 6 | 11 | 0.25 | 10.6 | Agitation | MeOH:Water 90:10 | 3.443 |
| 6 | 12 | 0.25 | 7.48 | Agitation | MeOH:Water 90:10 | 4.982 |
| 7 | 13 | 2 | 10.6 | Vacuum | Water | 2.156 |
| 7 | 14 | 2 | 8.6 | Vacuum | Water | 3.161 |
| 8 | 15 | 2 | 7.48 | Vacuum | MeOH:Water 45:55 | 4.65 |
| 8 | 16 | 2 | 10.6 | Vacuum | MeOH:Water 45:55 | 3.001 |
| 9 | 17 | 2 | 10.6 | Vacuum | MeOH:Water 90:10 | 4.01 |
| 9 | 18 | 2 | 7.48 | Vacuum | MeOH:Water 90:10 | 3.921 |
| 10 | 19 | 0.25 | 10.6 | Agitation | Water | 3.616 |
| 10 | 20 | 0.25 | 7.48 | Agitation | Water | 1.689 |
| 11 | 21 | 0.25 | 8.6 | Ag + Vacuum | Water | 2.144 |
| 11 | 22 | 0.25 | 10.6 | Ag + Vacuum | Water | 2.999 |
| 12 | 23 | 1 | 9.6 | Vacuum | Water | 3.013 |
| 12 | 24 | 1 | 7.48 | Vacuum | Water | 2.998 |
| 13 | 25 | 0.25 | 10.6 | Ag + Vacuum | MeOH:Water 90:10 | 3.45 |
| 13 | 26 | 0.25 | 7.48 | Ag + Vacuum | MeOH:Water 90:10 | 3.45 |
| 14 | 27 | 2 | 10.6 | Agitation | MeOH:Water 45:55 | 8.165 |
| 14 | 28 | 2 | 7.48 | Agitation | MeOH:Water 45:55 | 8.416 |
| 15 | 29 | 0.25 | 8.6 | Vacuum | MeOH:Water 45:55 | 2.344 |
| 15 | 30 | 0.25 | 10.6 | Vacuum | MeOH:Water 45:55 | 3.019 |
| 16 | 31 | 0.25 | 7.48 | Vacuum | Water | 2.622 |
| 16 | 32 | 0.25 | 10.6 | Vacuum | Water | 2.558 |
| 17 | 33 | 0.25 | 10.6 | Agitation | MeOH:Water 45:55 | 3.016 |
| 17 | 34 | 0.25 | 7.48 | Agitation | MeOH:Water 45:55 | 2.873 |
| 18 | 35 | 2 | 7.48 | Ag + Vacuum | MeOH:Water 90:10 | 7.01 |
| 18 | 36 | 2 | 10.6 | Ag + Vacuum | MeOH:Water 90:10 | 6.492 |
| 19 | 37 | 2 | 10.6 | Agitation | Water | 4.128 |
| 19 | 38 | 2 | 7.48 | Agitation | Water | 3.59 |

| **Table S4: D-optimal split plot design generated for furosemide** | | | | | | |
| --- | --- | --- | --- | --- | --- | --- |
|  |  | **Factor 1** | **Factor 2** | **Factor 3** | **Factor 4** | **Response 1** |
| **Group** | **Run** | **a:Ratio** | **b:pH** | **c:Method** | **d:Solvent** | **Weight gain** |
| 1 | 1 | 0.25 | 8.03 | Agitation | MeOH:Water 90:10 | 3.146 |
| 1 | 2 | 0.25 | 3.9 | Agitation | MeOH:Water 90:10 | 2.294 |
| 2 | 3 | 0.25 | 3.9 | Ag + Vacuum | MeOH:Water 57.5:42.5 | 1.465 |
| 2 | 4 | 0.25 | 8.03 | Ag + Vacuum | MeOH:Water 57.5:42.5 | 0.982 |
| 3 | 5 | 2 | 8.03 | Ag + Vacuum | MeOH:Water 25:75 | 3.462 |
| 3 | 6 | 2 | 3.9 | Ag + Vacuum | MeOH:Water 25:75 | 2.97 |
| 4 | 7 | 1 | 5.9 | Vacuum | MeOH:Water 90:10 | 3.585 |
| 4 | 8 | 1 | 3.9 | Vacuum | MeOH:Water 90:10 | 1.932 |
| 5 | 9 | 2 | 8.03 | Ag + Vacuum | MeOH:Water 90:10 | 7.497 |
| 5 | 10 | 2 | 5.9 | Ag + Vacuum | MeOH:Water 90:10 | 5.505 |
| 6 | 11 | 0.25 | 3.9 | Agitation | MeOH:Water 57.5:42.5 | 2.013 |
| 6 | 12 | 0.25 | 8.03 | Agitation | MeOH:Water 57.5:42.5 | 4.533 |
| 7 | 13 | 0.25 | 8.03 | Vacuum | MeOH:Water 25:75 | 2.641 |
| 7 | 14 | 0.25 | 3.9 | Vacuum | MeOH:Water 25:75 | 3.017 |
| 8 | 15 | 0.25 | 5.9 | Vacuum | MeOH:Water 90:10 | 2.652 |
| 8 | 16 | 0.25 | 8.03 | Vacuum | MeOH:Water 90:10 | 3.461 |
| 9 | 17 | 0.25 | 8.03 | Agitation | MeOH:Water 90:10 | 2.087 |
| 9 | 18 | 0.25 | 3.9 | Agitation | MeOH:Water 25:75 | 3.493 |
| 10 | 19 | 2 | 3.9 | Ag + Vacuum | MeOH:Water 57.5:42.5 | 5.8 |
| 10 | 20 | 2 | 8.03 | Ag + Vacuum | MeOH:Water 57.5:42.5 | 5.277 |
| 11 | 21 | 2 | 3.9 | Agitation | MeOH:Water 25:75 | 4.683 |
| 11 | 22 | 2 | 8.03 | Agitation | MeOH:Water 25:75 | 3.176 |
| 12 | 23 | 2 | 3.9 | Vacuum | MeOH:Water 25:75 | 3.825 |
| 12 | 24 | 2 | 8.03 | Vacuum | MeOH:Water 25:75 | 3.925 |
| 13 | 25 | 0.25 | 3.9 | Vacuum | MeOH:Water 57.5:42.5 | 1.658 |
| 13 | 26 | 0.25 | 8.03 | Vacuum | MeOH:Water 57.5:42.5 | 2.008 |
| 14 | 27 | 2 | 8.03 | Agitation | MeOH:Water 57.5:42.5 | 6.722 |
| 14 | 28 | 2 | 3.9 | Agitation | MeOH:Water 57.5:42.5 | 5.612 |
| 15 | 29 | 2 | 8.03 | Vacuum | MeOH:Water 90:10 | 4.881 |
| 15 | 30 | 2 | 3.9 | Vacuum | MeOH:Water 90:10 | 2.019 |
| 16 | 31 | 0.25 | 3.9 | Ag + Vacuum | MeOH:Water 25:75 | 2.168 |
| 16 | 32 | 0.25 | 8.03 | Ag + Vacuum | MeOH:Water 25:75 | 2.919 |
| 17 | 33 | 0.25 | 8.03 | Ag + Vacuum | MeOH:Water 90:10 | 4.987 |
| 17 | 34 | 0.25 | 3.9 | Ag + Vacuum | MeOH:Water 90:10 | 5.09 |
| 18 | 35 | 2 | 5.9 | Vacuum | MeOH:Water 57.5:42.5 | 4.794 |
| 18 | 36 | 2 | 8.03 | Vacuum | MeOH:Water 57.5:42.5 | 5.115 |
| 19 | 37 | 2 | 8.03 | Agitation | MeOH:Water 90:10 | 8.702 |
| 19 | 38 | 2 | 3.9 | Agitation | MeOH:Water 90:10 | 8.016 |

**Table S5: Mass gain (%) for verapamil hydrochloride loaded halloysite nanotubes**

REML (REstricted Maximum Likelihood) analysis
Kenward-Roger p-values

| **Source** | **Term df** | **Error df** | **F-value** | **p-value** |  |
| --- | --- | --- | --- | --- | --- |
| **Whole-plot** | 14 | 3.76 | 1.37 | 0.4215 | not significant |
| a-Ratio | 1 | 3.72 | 1.07 | 0.3633 |  |
| c-Method | 2 | 3.80 | 2.77 | 0.1810 |  |
| d-Solvent | 2 | 3.80 | 5.43 | 0.0769 |  |
| Ac | 2 | 3.72 | 0.3465 | 0.7278 |  |
| Ad | 2 | 3.72 | 0.1267 | 0.8847 |  |
| Cd | 4 | 3.74 | 0.2278 | 0.9089 |  |
| a² | 1 | 3.93 | 2.95 | 0.1623 |  |
| **Subplot** | 7 | 12.28 | 3.01 | 0.0438 | Significant |
| B-pH | 1 | 12.73 | 10.31 | 0.0070 |  |
| aB | 1 | 11.94 | 0.3941 | 0.5420 |  |
| Bc | 2 | 12.06 | 0.9536 | 0.4126 |  |
| Bd | 2 | 12.06 | 0.8487 | 0.4520 |  |
| B² | 1 | 14.39 | 1.15 | 0.3020 |  |

**P-values** less than 0.0500 indicate model terms are significant. In this case B is a significant model term. Values greater than 0.1000 indicate the model terms are not significant. If there are many insignificant model terms (not counting those required to support hierarchy), model reduction may improve your model.

**Table S6: Mass gain (%) for flurbiprofen loaded halloysite nanotubes**

REML (REstricted Maximum Likelihood) analysis
Kenward-Roger p-values

| **Source** | **Term df** | **Error df** | **F-value** | **p-value** |  |
| --- | --- | --- | --- | --- | --- |
| **Whole-plot** | 14 | 3.74 | 7.65 | 0.0369 | significant |
| a-Ratio | 1 | 3.70 | 32.27 | 0.0060 |  |
| c-Method | 2 | 3.85 | 4.70 | 0.0925 |  |
| d-Solvent | 2 | 3.85 | 3.20 | 0.1517 |  |
| Ac | 2 | 3.70 | 1.89 | 0.2718 |  |
| Ad | 2 | 3.70 | 1.88 | 0.2737 |  |
| Cd | 4 | 3.74 | 4.04 | 0.1106 |  |
| a² | 1 | 3.84 | 16.67 | 0.0164 |  |
| **Subplot** | 7 | 12.92 | 0.1622 | 0.9888 | not significant |
| B-pH | 1 | 12.71 | 0.1510 | 0.7040 |  |
| aB | 1 | 12.67 | 0.0977 | 0.7596 |  |
| Bc | 2 | 12.57 | 0.2204 | 0.8053 |  |
| Bd | 2 | 12.57 | 0.1688 | 0.8466 |  |
| B² | 1 | 15.41 | 0.0687 | 0.7967 |  |

**P-values** less than 0.0500 indicate model terms are significant. In this case a, a² are significant model terms. Values greater than 0.1000 indicate the model terms are not significant. If there are many insignificant model terms (not counting those required to support hierarchy), model reduction may improve your model.

**Table S7: Mass gain (%) for atenolol loaded halloysite nanotubes**

REML (REstricted Maximum Likelihood) analysis
Kenward-Roger p-values

| **Source** | **Term df** | **Error df** | **F-value** | **p-value** |  |
| --- | --- | --- | --- | --- | --- |
| **Whole-plot** | 14 | 4.02 | 6.49 | 0.0415 | significant |
| a-Ratio | 1 | 3.97 | 32.20 | 0.0049 |  |
| c-Method | 2 | 4.10 | 8.61 | 0.0341 |  |
| d-Solvent | 2 | 4.10 | 9.90 | 0.0270 |  |
| Ac | 2 | 3.97 | 4.89 | 0.0850 |  |
| Ad | 2 | 3.97 | 3.08 | 0.1557 |  |
| Cd | 4 | 4.00 | 1.17 | 0.4401 |  |
| a² | 1 | 4.20 | 0.0940 | 0.7737 |  |
| **Subplot** | 7 | 12.87 | 0.6695 | 0.6947 | not significant |
| B-pH | 1 | 12.52 | 0.1371 | 0.7173 |  |
| aB | 1 | 12.59 | 3.60 | 0.0809 |  |
| Bc | 2 | 12.50 | 0.3924 | 0.6835 |  |
| Bd | 2 | 12.50 | 0.0152 | 0.9849 |  |
| B² | 1 | 15.88 | 0.0373 | 0.8494 |  |

**P-values** less than 0.0500 indicate model terms are significant. In this case a, c, d are significant model terms. Values greater than 0.1000 indicate the model terms are not significant. If there are many insignificant model terms (not counting those required to support hierarchy), model reduction may improve your model.

**Table S8: Mass gain (%) for furosemide loaded halloysite nanotubes**

REML (Restricted Maximum Likelihood) analysis for selected model

Kenward-Roger p-values

| **Source** | **df** | **df** |  | **Prob > F** |  |
| --- | --- | --- | --- | --- | --- |
| **Whole**-**plot** | 14 | 4.06 | 2.23 | 0.2263 | not significant |
| a-Ratio | 1 | 4.03 | 14.66 | 0.0184 |  |
| c-Method | 2 | 4.08 | 1.67 | 0.2946 |  |
| d-Solvent | 2 | 4.08 | 2.29 | 0.2155 |  |
| Ac | 2 | 4.03 | 0.74 | 0.5315 |  |
| Ad | 2 | 4.03 | 1.39 | 0.3479 |  |
| Cd | 4 | 4.04 | 0.97 | 0.5112 |  |
| a^2 | 1 | 4.27 | 0.045 | 0.8413 |  |
| **Subplot** | 7 | 12.42 | 1.50 | 0.2552 | not significant |
| b-pH | 1 | 12.43 | 4.04 | 0.0665 |  |
| aB | 1 | 12.22 | 0.25 | 0.6294 |  |
| Bc | 2 | 12.27 | 0.50 | 0.6174 |  |
| Bd | 2 | 12.27 | 3.06 | 0.0835 |  |
| B^2 | 1 | 13.85 | 2.450E-003 | 0.9612 |  |

**P-values** less than 0.0500 indicate model terms are significant. In this case a, c, d are significant model terms. Values greater than 0.1000 indicate the model terms are not significant. If there are many insignificant model terms (not counting those required to support hierarchy), model reduction may improve your model.

**Supplementary Figures**


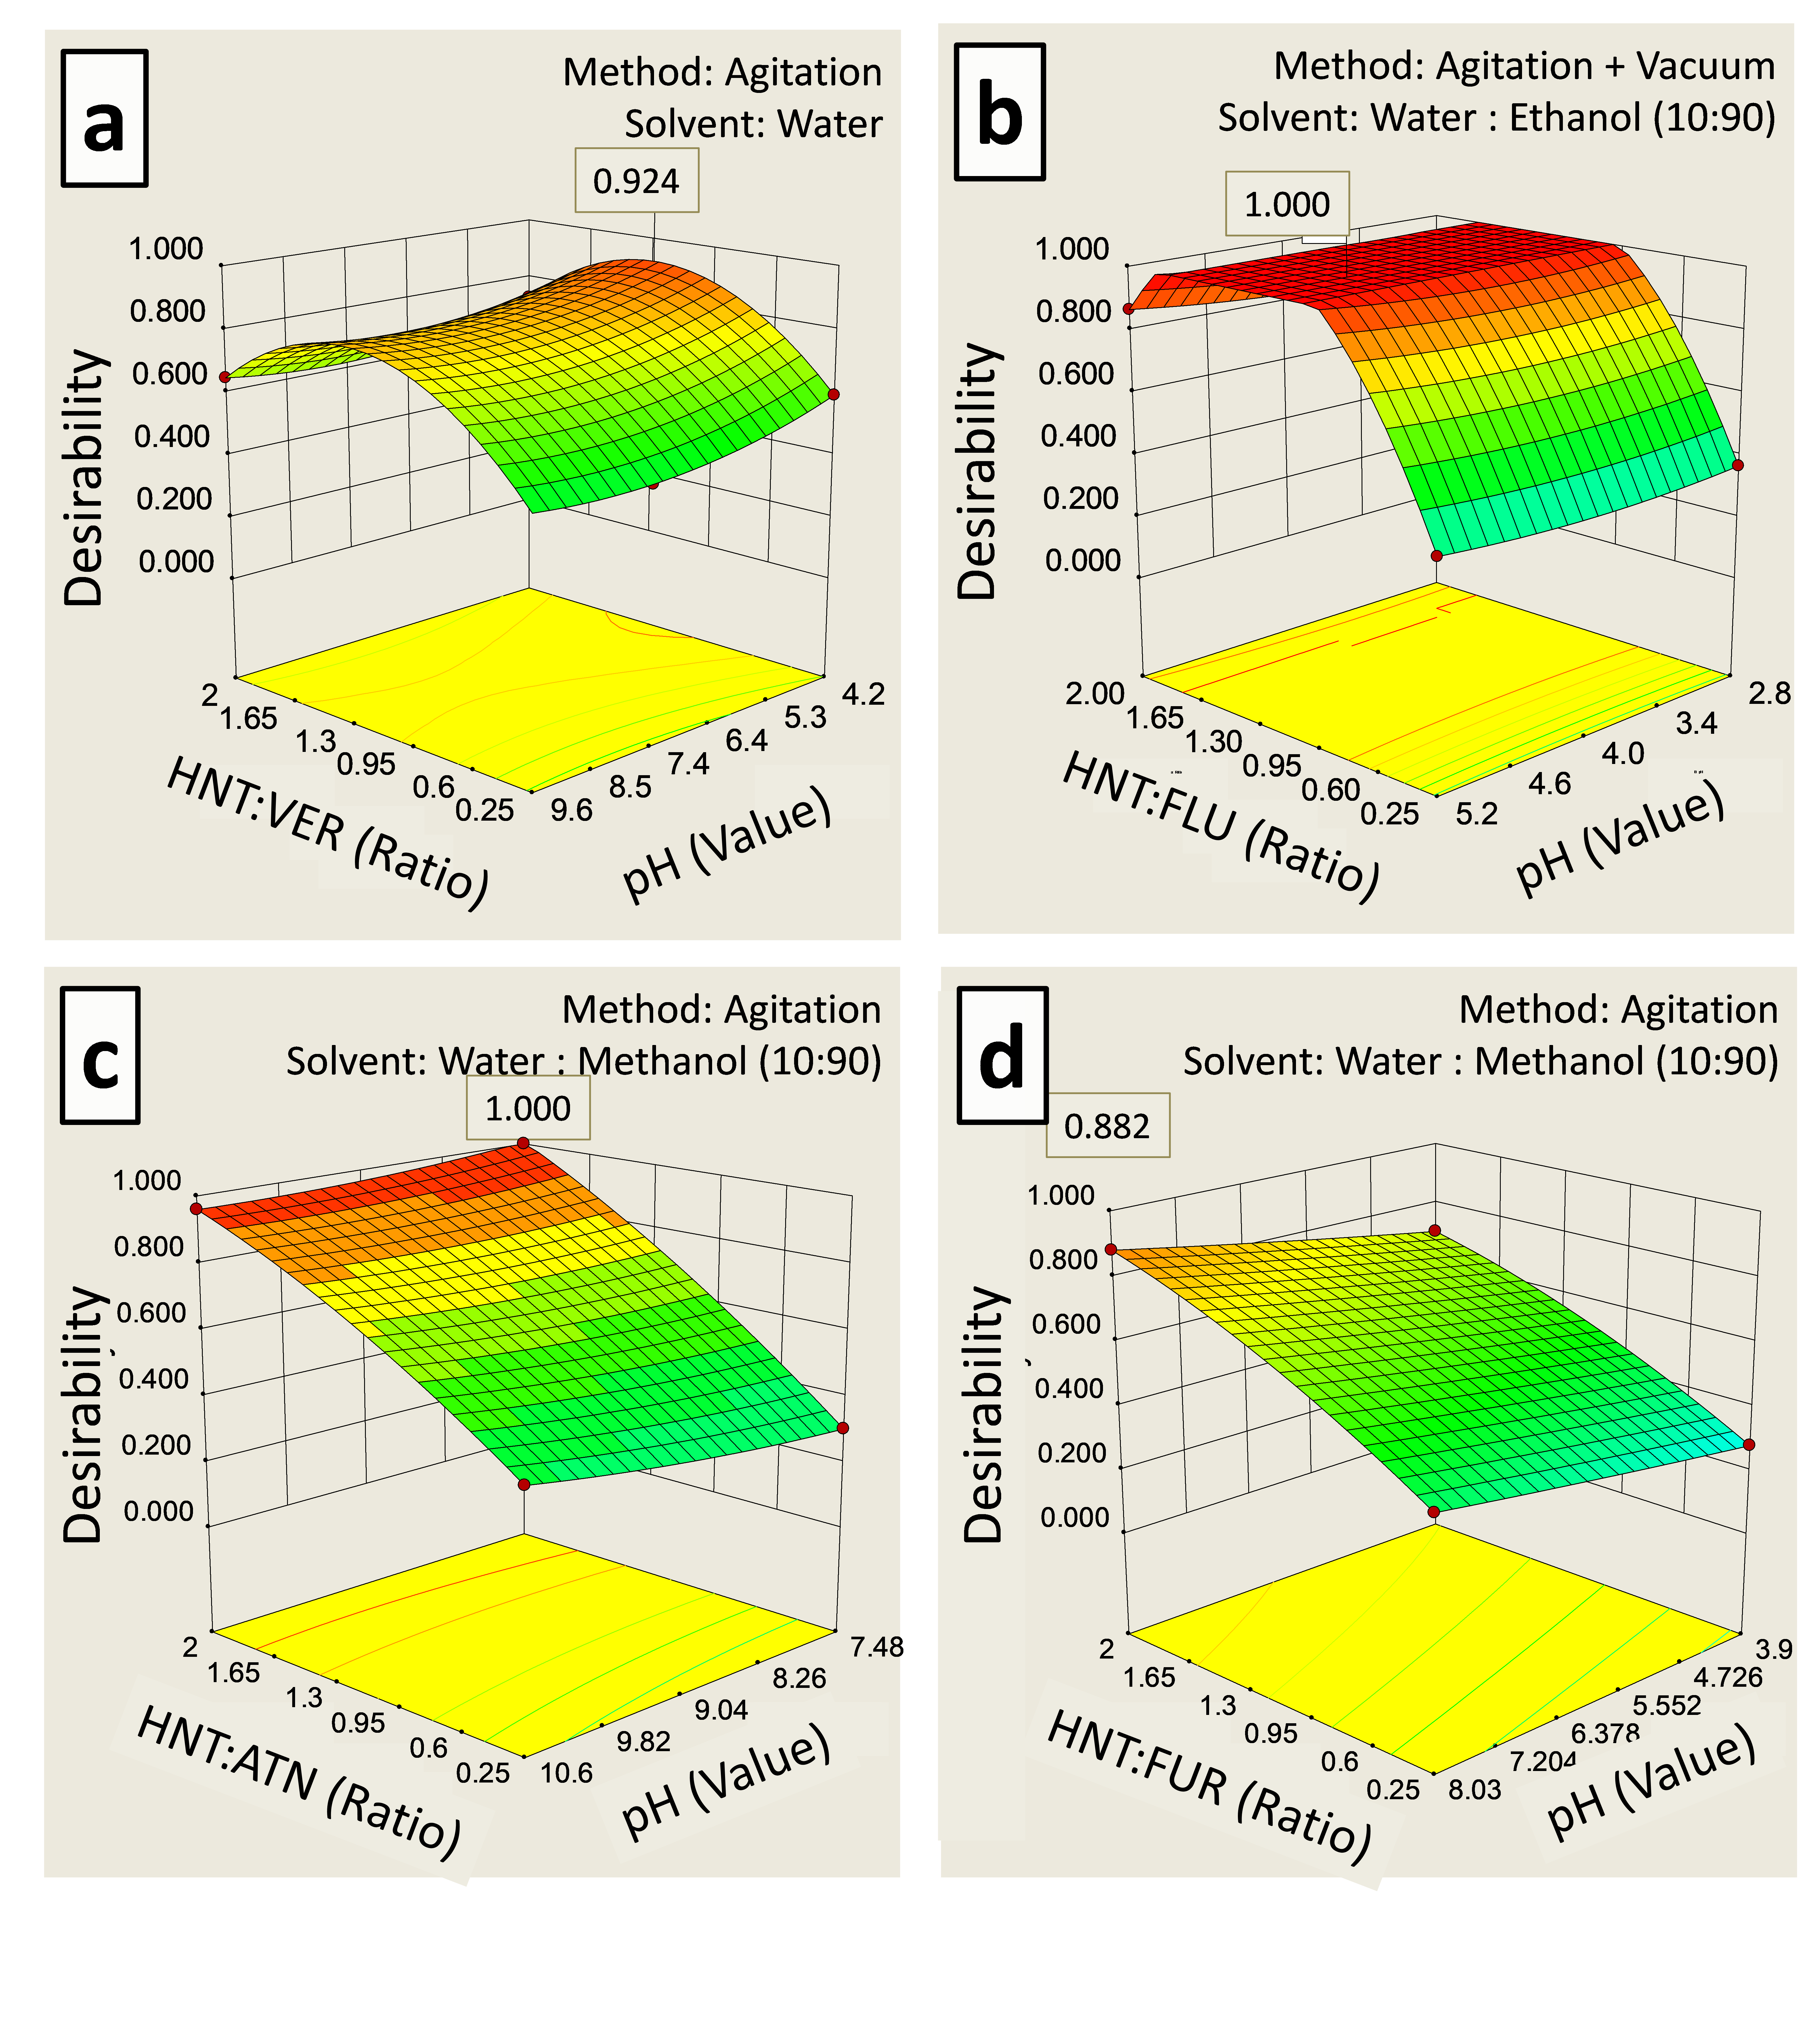
**Figure S1.** 3D response surface optimization plots (desirability) against the set of constraints for best loading (percent weight gain) of halloysite nanotubes with (a) verapamil (b) flurbiprofen (c) atenolol (d) furosemide.


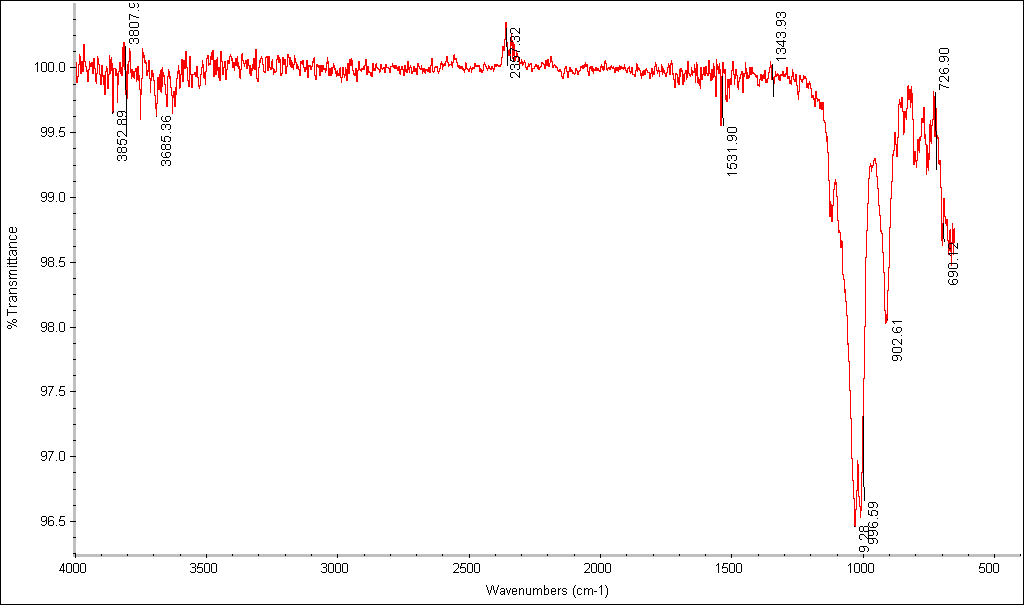


**Figure S2-1-(a).** FTIR spectra of halloysite nanotubes [HNTs].

**
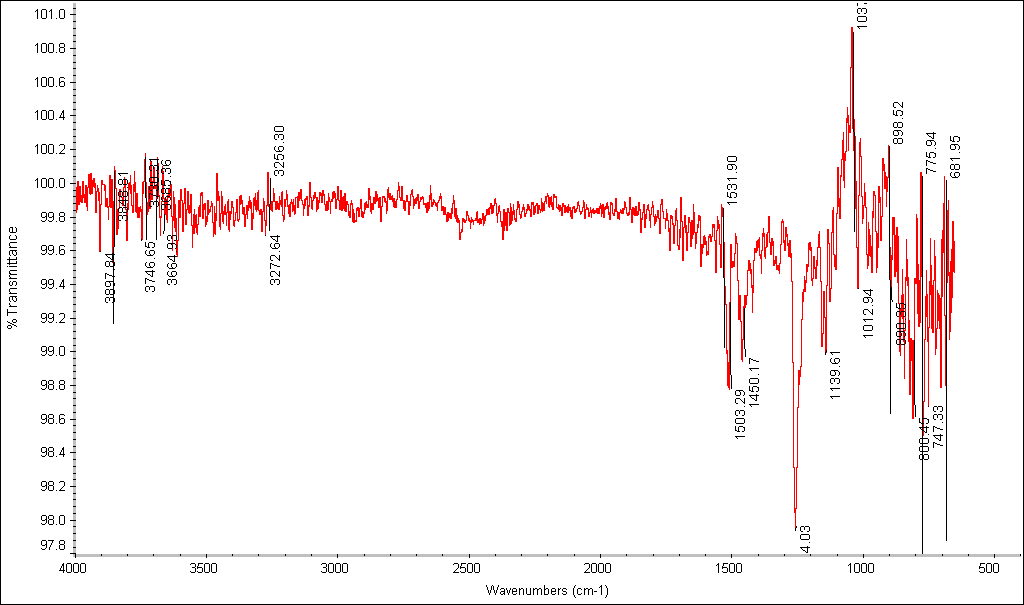
**

**Figure S2-1-(b).** FTIR spectra of verapamil HCl.

**
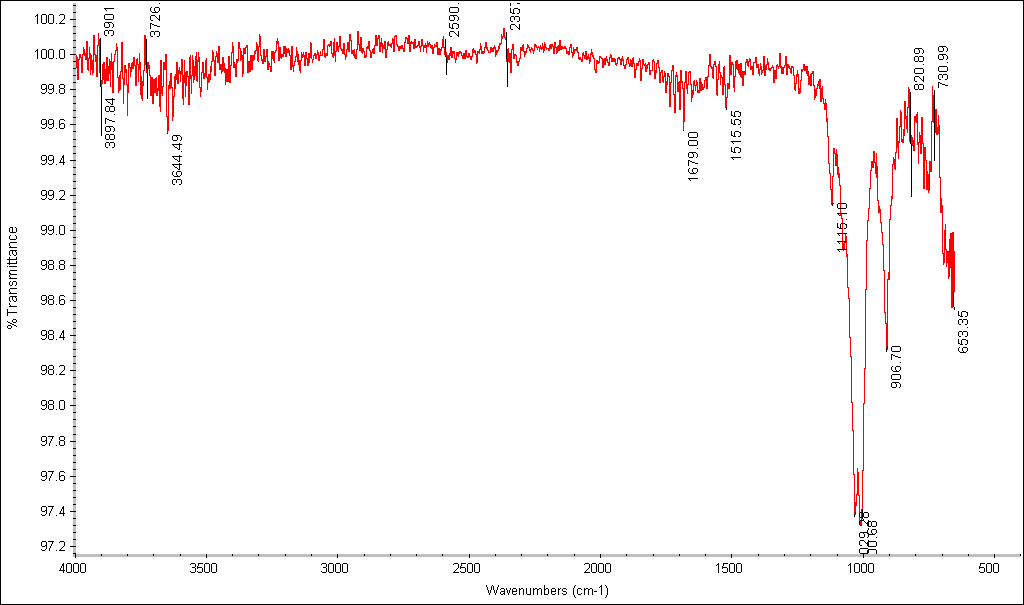
**

**Figure S2-1-(c).** FTIR spectra of verapamil loaded HNTs.

**
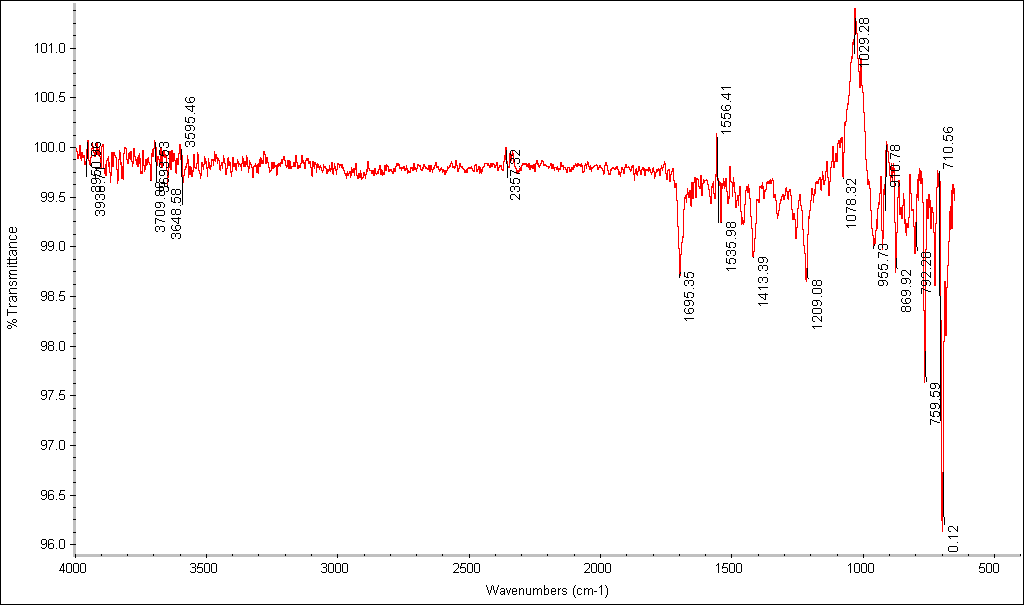
**

**Figure S2-2-(a)** FTIR spectra of flurbiprofen.

**
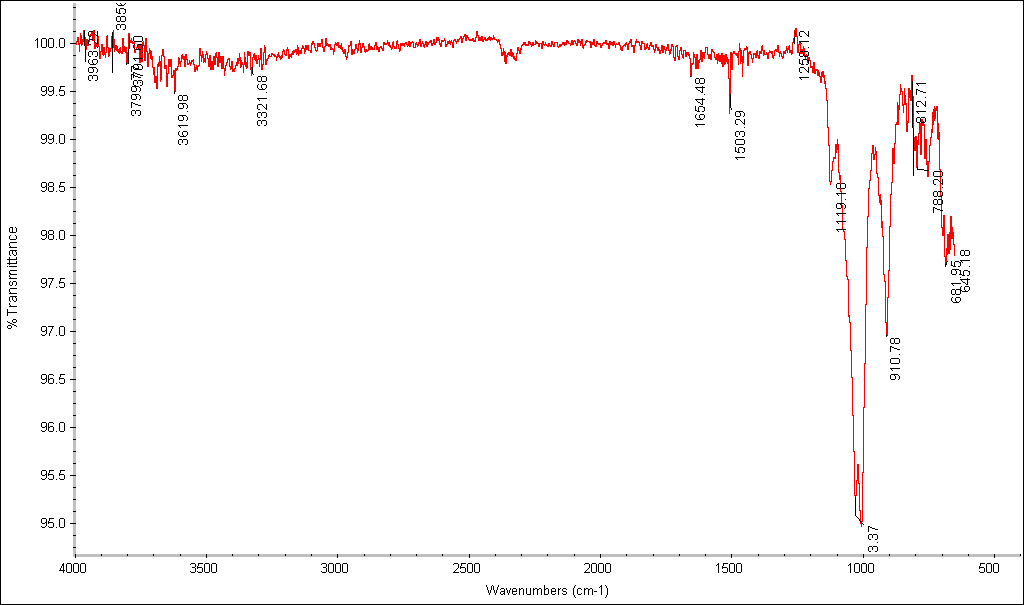
**

**Figure S2-2-(b).** FTIR spectra of flurbiprofen loaded HNTs.

**
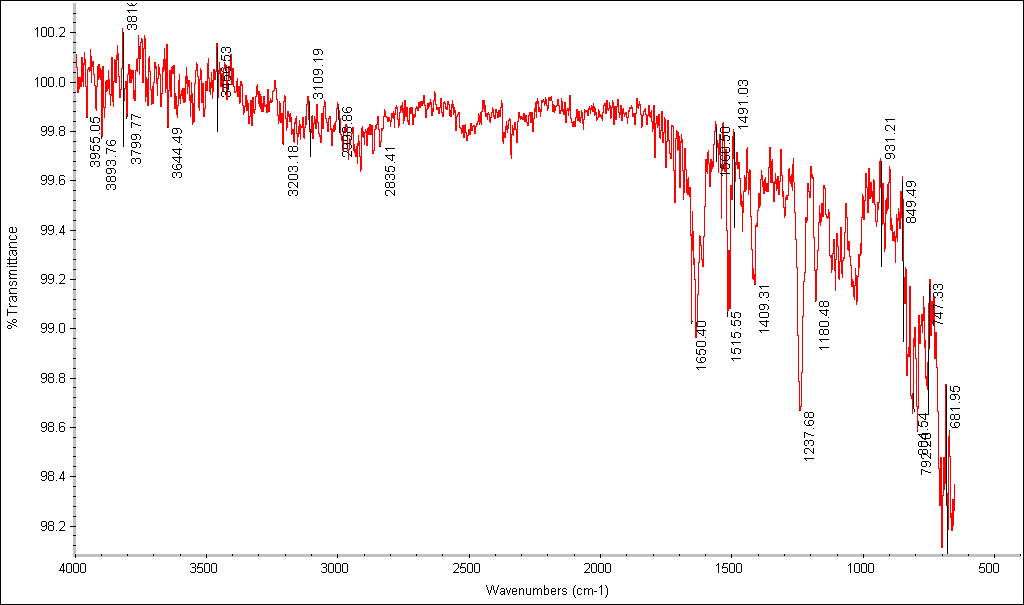
**

**Figure S2-3-(a).** FTIR spectra of atenolol.

**
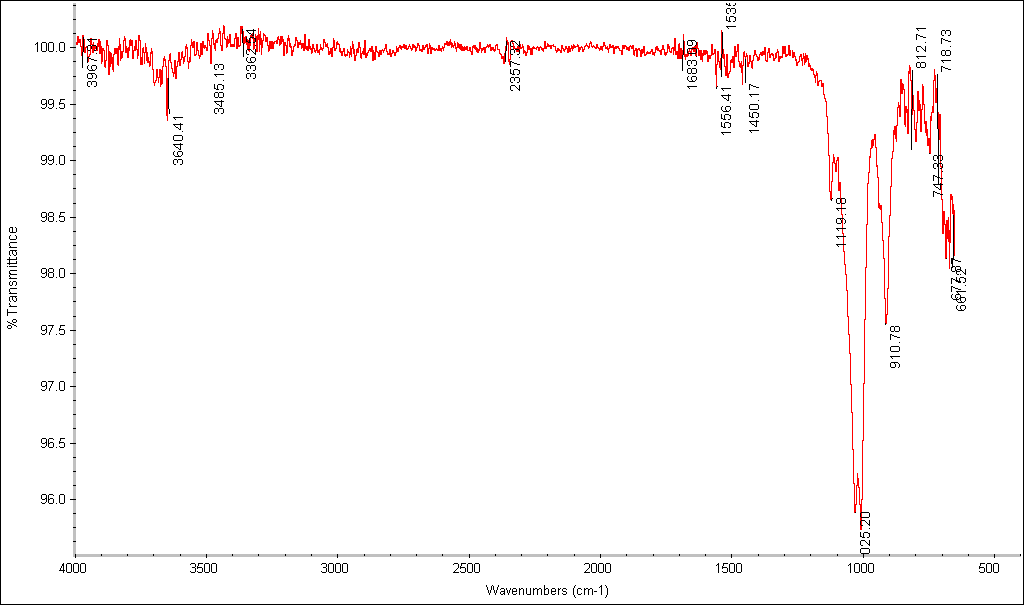
**

**Figure S2-3-(b).** FTIR spectra of atenolol loaded HNTs.

**
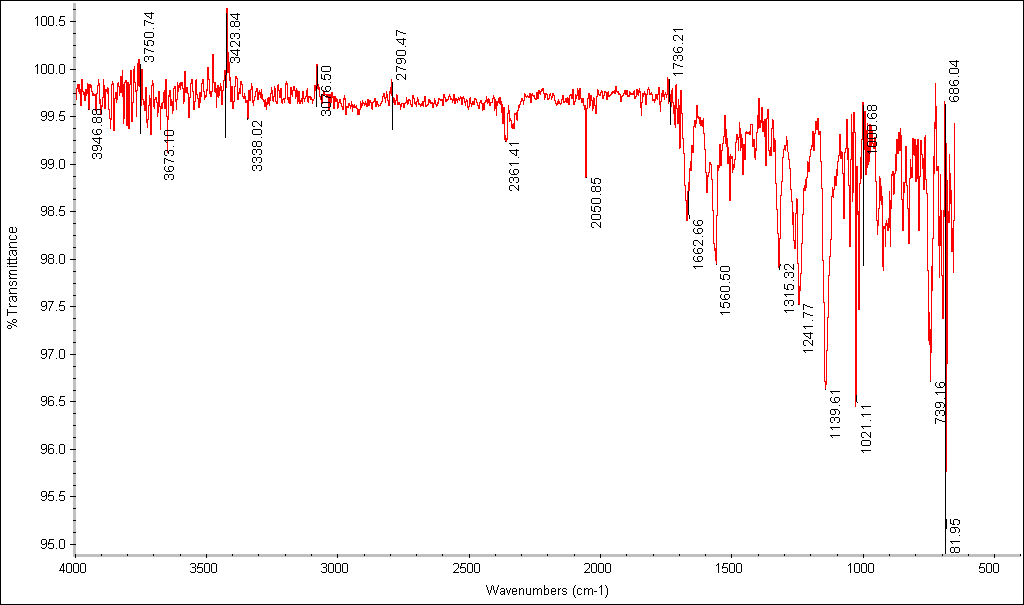
**

**Figure S2-4-(a).** FTIR spectra of furosemide.

**
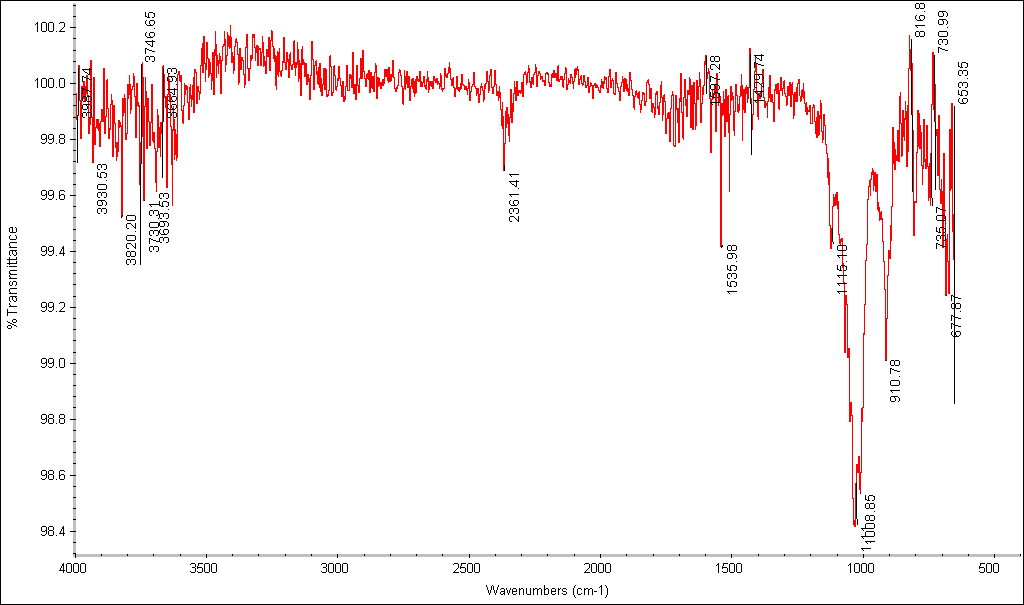
**

**Figure S2-4-(b).** FTIR spectra of furosemide loaded HNTs.

**
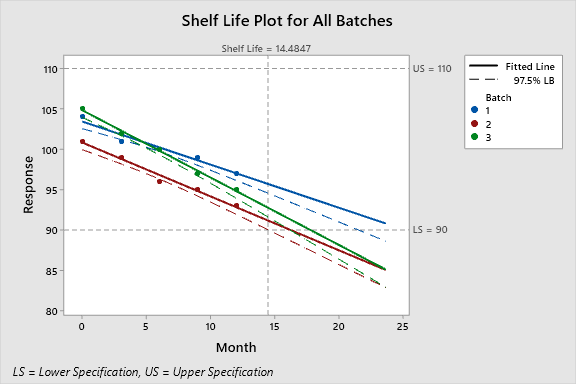
**

**Figure S3-1.** Graph of stability profiling of verapamil HCl loaded HNTs.

**
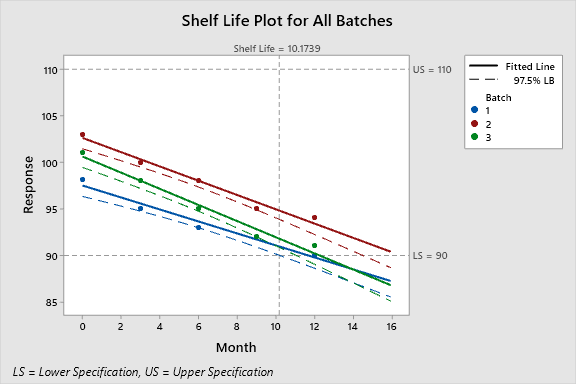
**

**Figure S3-2.** Graph of stability profiling of flurbiprofen loaded HNTs.

**
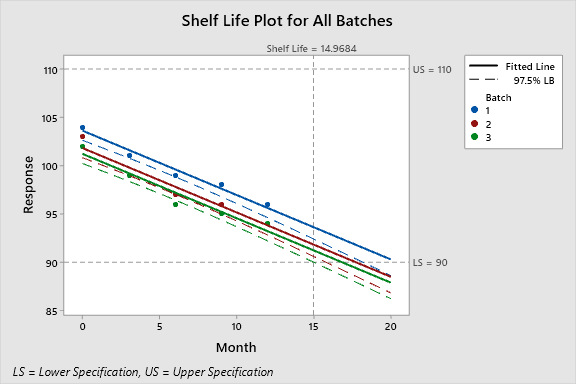
**

**Figure S3-3.** Graph of stability profiling of atenolol loaded HNTs.
